# Bericht über Versuche mit dem schwedischen Schontrawl auf den Jungschollengründen der Deutschen Bucht.

Von

A. Bückmann, Helgoland.

**I**m Mai 1929 wurden vom "Poseidon" aus eine Reihe von Fangversuchen mit dem schwedischen Schontrawl angestellt, um die Eignung dieses Geräts zur Schonung untermassiger Schollen zu erproben. Dabei konnten die Erfahrungen benutzt werden, die von der Biologischen Anstalt seit 1927 bei Gelegenheit von Vorversuchen mit dem Schongerät auf dem Motorschiff „Augusta“ gesammelt worden waren.

Für das Experiment des „Poseidon“ wurde ein Fangplatz ausgewählt, auf dem gute Schollenfänge zu erwarten waren, und in dessen Nachbarschaft die Schollenfischerei von deutschen und dänischen Kuttern zu der Zeit wirklich ausgeübt wurde. An dem Fangplatz in der Durchfahrt der Amrum Bank war es möglich, die Lage des Zuges durch Kreuzpeilung (Amrum Bank Feuerschiff, Vortrapptief Tonne, Hörnum und bei Nacht Helgoland Leuchtturm und andere Landfeuer) genau festzulegen. Verwendet wurde die Originalform des schwedischen Schontrawls, mit zwei dicht aufeinanderliegenden Schonfenstern aus starren rechteckigen Maschen. Diese Form hatte sich auf der „Augusta“ besser bewährt als einige gleichfalls erprobte Abänderungen. Das vom „Poseidon“ benutzte Netz hatte 38 m Kopftau- und 45 m Grundtaulänge. Die Schonfenster massen  $1,20 \times 2,00$  m und enthielten  $14 \times 70$  Schonmaschen von  $8,5 \times 2,5$  cm Weite. Die normalen Steertmaschen massen (in der Diagonale der langgezogenen Masche gemessen) 8 cm.

Um den Schoneffekt des Geräts zu ermitteln, sollten eine gleiche Zahl von Fängen mit dem Schontrawl und mit dem normalen Schleppnetz abwechselnd in ununterbrochener Folge gemacht werden. Die in beiden Geräten erzielten Gesamtfänge sollten dann verglichen werden.

Dies Verfahren zur Feststellung des Schoneffekts schien am geeignetsten, da das Prinzip des Hosentrawls aus technischen Gründen bei dem schwedischen Gerät nicht angewendet werden kann, und da die Verwendung des Fanges der Kontrollnetze über den Schonfenstern sich bei den Vorversuchen als irreführend erwiesen hatte. Benutzt man nämlich engmaschige Kontrollnetze, so halten diese auch solche Fische zurück, die durch die Maschen des normalen Steertes hätten entweichen können, sodass der Schoneffekt überschätzt wird. Nur während der ersten 4 Schontrawlfänge wurden Kontrollnetze über den Schonfenstern angebracht um festzustellen, ob nicht eine zu grosse Zahl von brauchbaren Schollen durch die Schonmaschen entkäme. Das war aber nicht der Fall, da die Kontrollnetze keine Schollen von mehr als 25 cm und nur einzelne Fische der Längen von 23—25 cm enthielten. Bei den Versuchen wurde immer dasselbe Vordernetz verwendet, nur der Steert wurde nach je 2 Fängen ausgetauscht, indem der Steert mit dem Schonapparat durch einen einfachen Steert ersetzt wurde oder umgekehrt.

Über die praktische Handhabung des Netzes ist zu sagen, dass das Aussetzen und Einholen der Kurre keine aussergewöhnlichen Schwierigkeiten bietet. Dagegen erwies sich die Konstruktion des Schonteils als zu schwach für die Beanspruchung, die das Gerät bei dem wiederholten Einziehen erfuhr. Die Maschen des Schonfensters werden bekanntlich durch einige quer über das Ober- und Unternetz gehende Stäbe angespannt gehalten. Das Tau, mit dem der Steert über Deck gehievt wird, wird oberhalb des Schonteils (nach der Netzöffnung zu) um das Netz gelegt. Es schnürt es zusammen, und besonders bei grösseren Fängen reisst infolge des entstehenden Zuges die Befestigung der Fenstermaschen am obersten Stabe, sodass die Maschen zur Mitte hin zusammenschnurren.

Es wurden mit jedem Gerät 10 Fänge gemacht. Für den Vergleich muss aber einer von diesen ausgeschieden werden, weil das Schiff unter dem Einfluss einer Gewitterböe erheblich vertrieben war und der Fang eine ganz abweichende Zusammensetzung zeigte. Weitere Schwierigkeiten ergaben sich aus der tageszeitlichen Veränderung der Fangmenge. Wenn auch im Laufe des Experiments mit beiden Geräten zu den verschiedensten Tageszeiten gefischt worden ist, so genügte der Umfang des Experiments doch nicht, um den genannten Einfluss ganz auszuschalten. Die tageszeitlichen Verschiedenheiten der Fangmenge waren grösser und setzten plötzlich ein als erwartet worden war. Die folgende Tabelle gibt eine Übersicht über diese Verhältnisse:

## Mittlere Fangmenge Stück:

| Tageszeit                                    |                         | Scholle | Kliesche |
|----------------------------------------------|-------------------------|---------|----------|
| Nacht. 20 <sup>h</sup> —5 <sup>h</sup>       | Normales Netz . . . . . | 1402    | 343      |
|                                              | Schontrawl . . . . .    | 1192    | 114      |
| Tag. 8 <sup>h</sup> —17 <sup>h</sup>         | Normales Netz . . . . . | 2555    | 542      |
|                                              | Schontrawl . . . . .    | 2848    | 234      |
| Dämmerung. 6 <sup>h</sup><br>18 <sup>h</sup> | Normales Netz . . . . . | 8008    | 1531     |
|                                              | Schontrawl . . . . .    | 5457    | 608      |

Es wurden also in den Nachtstunden nur etwa halb soviel Fische gefangen wie am Tage, aber die Fänge in der Dämmerung waren noch ungleich grösser als die Tagfänge. Zwei dieser grossen Fänge sind mit dem normalen Trawl in der Morgenstunde gemacht worden, nur ein Fang mit dem Schontrawl am Abend.

Es ist am zweckmässigsten, diese drei Fänge bei der Ermittlung des Schoneffekts auszuschalten. Würde man sie mitrechnen, so wäre der Fang des normalen Trawls viel grösser als der des Schontrawls, und zwar gerade auch bei den grösseren Längen. Dies Ergebnis wäre aber zweifellos falsch. Betrachtet man nun aber die Fangmengen in den Tag- und den Nachtfängen, so zeigt sich, dass von Schollen in beiden Netzen ungefähr gleich viel gefangen sind, während das Schontrawl stets merklich weniger Klieschen gefangen hat. Das Ergebnis bezüglich der Scholle muss überraschen. Wenn eine nennenswerte Schonung ausgeübt worden wäre, so müsste der Durchschnittsfang im Schontrawl eine geringere Stückzahl aufweisen, als der in der normalen Kurre.

In der Tat zeigt eine genauere Prüfung des Materials, dass die Schonung ganz minimal, ja nahezu gleich 0 gewesen ist. Nach Ausscheiden der 4 oben bezeichneten Fänge verbleiben noch je 8 vergleichbare Fänge mit jedem der Geräte. In diesen 8 Fangstunden sind in jedem Netz ca. 16000 Schollen gefangen worden, deren Längenzusammensetzung in der folgenden Tabelle wiedergegeben ist. Bei einigen Längen sind im Schontrawl weniger Schollen gefangen als im normalen Trawl, sodass man von einer Schonung sprechen kann. Das ist der Fall bei den Längen von 5—8 cm und von 13—16 cm, allerdings nur in geringem Masse, wie der Schoneffekt zeigt, der in der Tabelle errechnet ist (in Prozent des Fanges in dem normalen Trawl). Doch findet sich solche Schonung auch bei den grösseren Schollen von 25 cm an, und von den dazwischenliegenden Längen hat umgekehrt das Schontrawl mehr gefangen als das nor-

male Trawl. Im ganzen genommen ist der Unterschied zwischen den beiden Messungsreihen nicht grösser, als er bei zwei Fangserien mit ein und demselben Gerät sein würde. Das beweist auch der geringe Unterschied in der Lage des Längenmittels beider Reihen: beim Schontrawl 20,60 cm, beim normalen Trawl 20,54 cm. Es ergibt sich also, dass praktisch gar keine Schonung erfolgt ist. Dies ungünstige Ergebnis ist übrigens nicht auf das Ausscheiden einiger Fänge aus dem Material zurückzuführen, denn auch bei den Gesamtmessungsreihen findet sich nur ein geringer Unterschied in der relativen Grössenzusammensetzung, und die Mittelwerte beider Reihen unterscheiden sich auch nur um den geringen Betrag von 0,3 cm.

Günstigere Ergebnisse dagegen haben wir bei der Kliesche. Schon an der oben angegebenen Durchschnittsfangmenge sahen wir, dass das Schontrawl stets viel weniger Klieschen fängt als das normale Netz. Aus den in der Tabelle gegebenen Messungsreihen der 8 Stunden-Fänge ersieht man, dass dies wirklich auf die Schonung der kleinen Klieschen zurückzuführen ist. Der Schoneffekt hält sich bis zu der Länge von 20 cm hin in sehr befriedigender Höhe.

Es ist sehr zu bedauern, dass diese Schonung nur die Kliesche, nicht die wirtschaftlich ungleich wertvollere Scholle betrifft. Aber gerade das Funktionieren der Schonung bei den Klieschen beweist, dass nicht unsachgemässe Anfertigung und Handhabung des Geräts Schuld an dem Versagen der Schonwirkung bei der Scholle haben, sondern vielmehr das Verhalten dieses Fisches im Netz und vor allen Dingen im Schonteil desselben. Auch bei den Vorversuchen war bereits festgestellt, dass der Schoneffekt bei der Kliesche bedeutend grösser war als bei der Scholle. Die Fische passieren, wie mehrfach beobachtet wurde, den Schonteil nicht einzeln während des Fanges. Da nämlich das obere und das untere Schonfenster dicht aufeinanderliegen müssen, so sammeln sich die Fische davor im Netzsack an und gleiten erst, wenn der Steert beim Hieven der Wasseroberfläche nahe kommt, in dichten Massen durch den Schonteil. Den breiteren und weniger beweglichen Schollen gelingt es dann anscheinend nur selten, durch die Schonmaschen zu entschlüpfen, während die schlanken und beweglichen Klieschen dies fertigbringen, wobei ihnen die Gewohnheit, den Körper stärker zu krümmen als die Scholle, zugute kommen mag. — Je mehr grosse Fische nun im Netz sind, umso mehr werden die Schonmaschen für die kleinen Schollen verdeckt werden; dadurch erklärt es sich wohl, dass wir bei den Vorversuchen mit der „Augusta“, wo kleinere Fänge kleinerer Fische gemacht wurden, einen etwas günstigeren Schoneffekt beobachtet hatten.

Über das Funktionieren des Netzes bei Rundfischfängen kann nichts

mitgeteilt werden. Es hat sich jedoch bei den britischen Versuchen gezeigt, dass die Schonung z.B. kleiner Gadiden durch eine mässige Vergrößerung der Maschen des normalen Trawls zu erreichen ist. Kompliziertere Apparate werden erst dann nötig, wenn man kleine Plattfische schonen will, ohne wesentliche Mengen von brauchbaren Rundfischen zu verlieren. Von den zu schonenden Plattfischen ist aber die Scholle unzweifelhaft die wichtigste. Die untermässigen Seezungen entkommen auch durch die Maschen des gewöhnlichen Fischdampfertrawls, die Klieschen sind in der Nordsee wirtschaftlich ziemlich bedeutungslos und bei den anderen Arten ist über die Vernichtung von Jungfischen kaum je Klage geführt worden. Wenn daher der Schoneffekt des Geräts in Bezug auf die Scholle fast alles zu wünschen übrig lässt, so ist das ein sehr ernst zu nehmender Mangel. Dazu kommt der Umstand, dass die Schonapparatur, wie oben erwähnt, leicht verletzlich ist. Häufige Reparaturen aber werden im praktischen Gebrauch als sehr lästig empfunden werden.

Schoneffekt des Schwedischen Schontrawls gegenüber dem normalen grossen Trawl des „Poseidon“ Mai 1929.

#### I. Scholle.

| Länge<br>cm | Normales Trawl<br>Anzahl | Schontrawl<br>Anzahl | Schonung<br>Anzahl | Schoneffekt<br>% | Mehr im<br>Schontrawl<br>Anzahl |
|-------------|--------------------------|----------------------|--------------------|------------------|---------------------------------|
| 5—6         | 26                       | 4                    | 22                 | 85               | ..                              |
| 7—8         | 65                       | 32                   | 33                 | 51               | ..                              |
| 9—10        | 58                       | 60                   | ..                 | ..               | 2                               |
| 11—12       | 489                      | 500                  | ..                 | ..               | 11                              |
| 13—14       | 1427                     | 1161                 | 266                | 19               | ..                              |
| 15—16       | 1204                     | 1124                 | 80                 | 7                | ..                              |
| 17—18       | 1937                     | 1991                 | ..                 | ..               | 54                              |
| 19—20       | 2756                     | 3100                 | ..                 | ..               | 344                             |
| 21—22       | 3283                     | 3790                 | ..                 | ..               | 507                             |
| 23—24       | 2434                     | 2604                 | ..                 | ..               | 170                             |
| 25—26       | 1287                     | 1207                 | 80                 | 6                | ..                              |
| 27—28       | 613                      | 409                  | 204                | 33               | ..                              |
| 29—30       | 197                      | 137                  | 60                 | 30               | ..                              |
| 31—32       | 44                       | 38                   | 6                  | 14               | ..                              |
| 33—34       | 6                        | 4                    | 2                  | 33               | ..                              |
| 35—36       | 2                        | 0                    | 2                  | 100              | ..                              |
| 37—38       | 2                        | 1                    | 1                  | 50               | ..                              |

II. *Kliesche.*

| Länge<br>cm | Normales Trawl<br>Anzahl | Schontrawl<br>Anzahl | Schonung<br>Anzahl | Schoneffekt<br>% | Mehr im<br>Schontrawl<br>Anzahl |
|-------------|--------------------------|----------------------|--------------------|------------------|---------------------------------|
| 3—4         | 4                        | 0                    | 4                  | 100              | ..                              |
| 5—6         | 34                       | 3                    | 31                 | 91               | ..                              |
| 7—8         | 12                       | 4                    | 8                  | 67               | ..                              |
| 9—10        | 239                      | 51                   | 188                | 79               | ..                              |
| 11—12       | 599                      | 185                  | 414                | 69               | ..                              |
| 13—14       | 644                      | 210                  | 434                | 67               | ..                              |
| 15—16       | 801                      | 265                  | 536                | 67               | ..                              |
| 17—18       | 603                      | 249                  | 354                | 57               | ..                              |
| 19—20       | 265                      | 142                  | 123                | 46               | ..                              |
| 21—22       | 157                      | 98                   | 59                 | 38               | ..                              |
| 23—24       | 111                      | 94                   | 15                 | 14               | ..                              |
| 25—26       | 45                       | 61                   | ..                 | ..               | 16                              |
| 27—28       | 21                       | 26                   | ..                 | ..               | 5                               |
| 29—30       | 4                        | 2                    | 2                  | 50               | ..                              |
| 31—32       | 2                        | 1                    | 1                  | 50               | ..                              |
